# Supplementary material for: Circular RNA cTFRC acts as the sponge of MicroRNA-107 to promote bladder carcinoma progression
Source: Springer Nature journal article supplement (doi:10.1186/s12943-019-0951-0), 2019-02-19
Supplement: MOESM1 [file 16492674]

## Supplemental Figure Legends

**Figure S1. TFRC expression is up-regulated and positively associated with advanced tumor grade of patients with BC.** (A, B) TFRC mRNA expression in BC and their adjacent tissues, the data were obtained from TCGA BC data set (nonparametric Mann–Whitney test,  $**P < 0.01$ ). (C) The high expression levels of TFRC in BC patients with high grade. (D) Advanced T stage is associated with higher TFRC levels. (E) The expression of TFRC higher in patients with lymphatic metastasis. (F) Prognostic significance of TFRC expression for TCGA BC patients was performed with TFRC values by using the median value as the cutoff.

**Figure S2. The expression correlation between miR-107 and cTFRC** (A) qPCR analysis of miR-107 expression in different BC cell lines. (B, C) miR-107 level negatively correlated with cTFRC mRNA expression in BC cell lines (B) and BC clinical samples (C). (D) Determination of cell invasive potential of EJ and T24 cells transfected with miR-107 mimic by transwell assay. (E) Proliferation of EJ and T24 cells transfected with miR-107 mimic assessed using 3H-TdR incorporation at the indicated days. Data are shown as mean  $\pm$ SD.  $**P < 0.01$  by two-tailed Student's t test. Data represent at least three independent experiments.

A

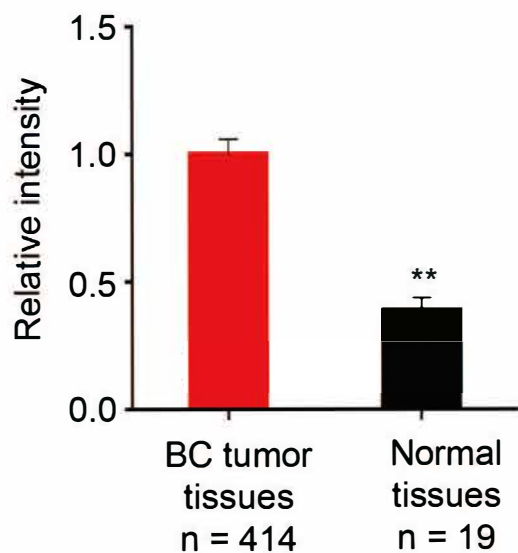

B

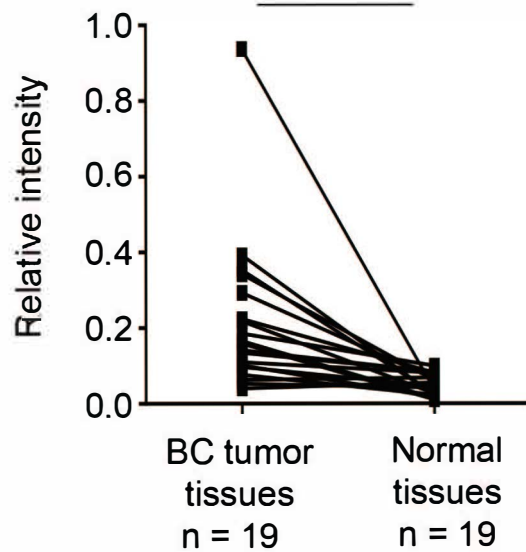

C

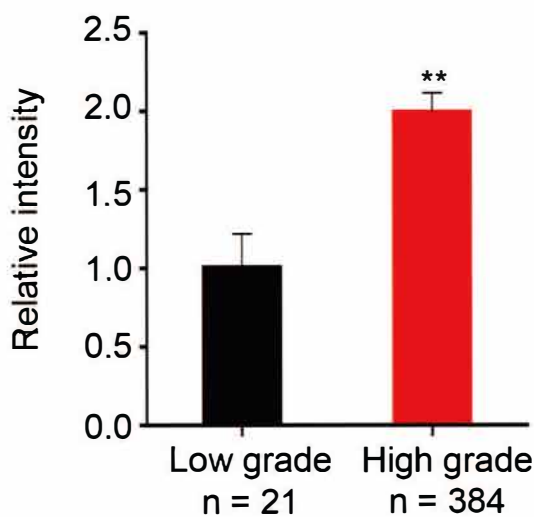

D

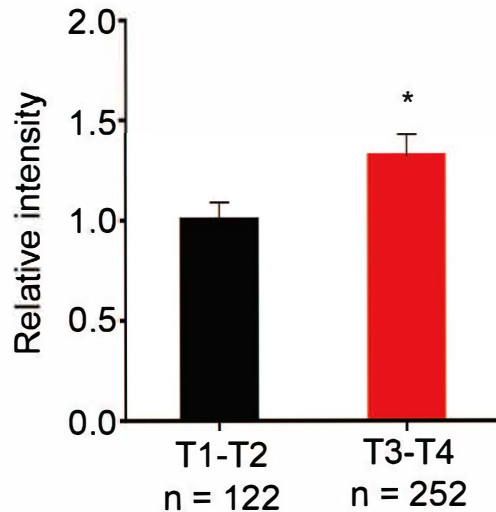

E

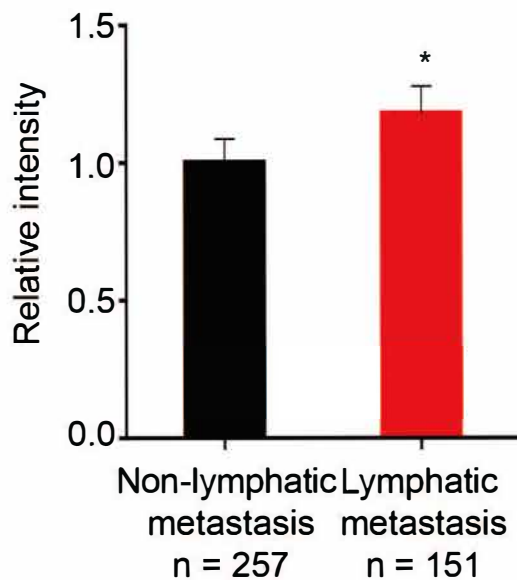

F

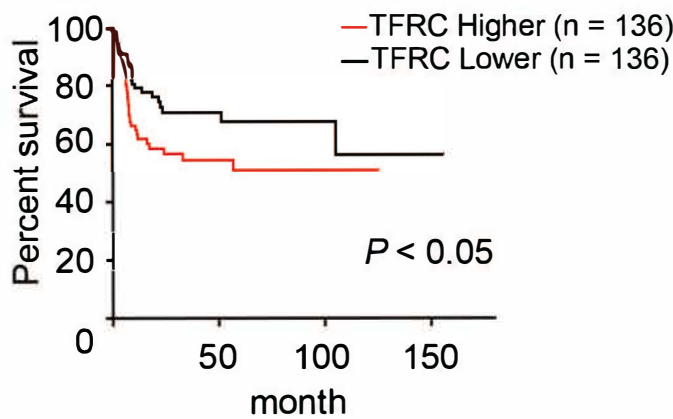

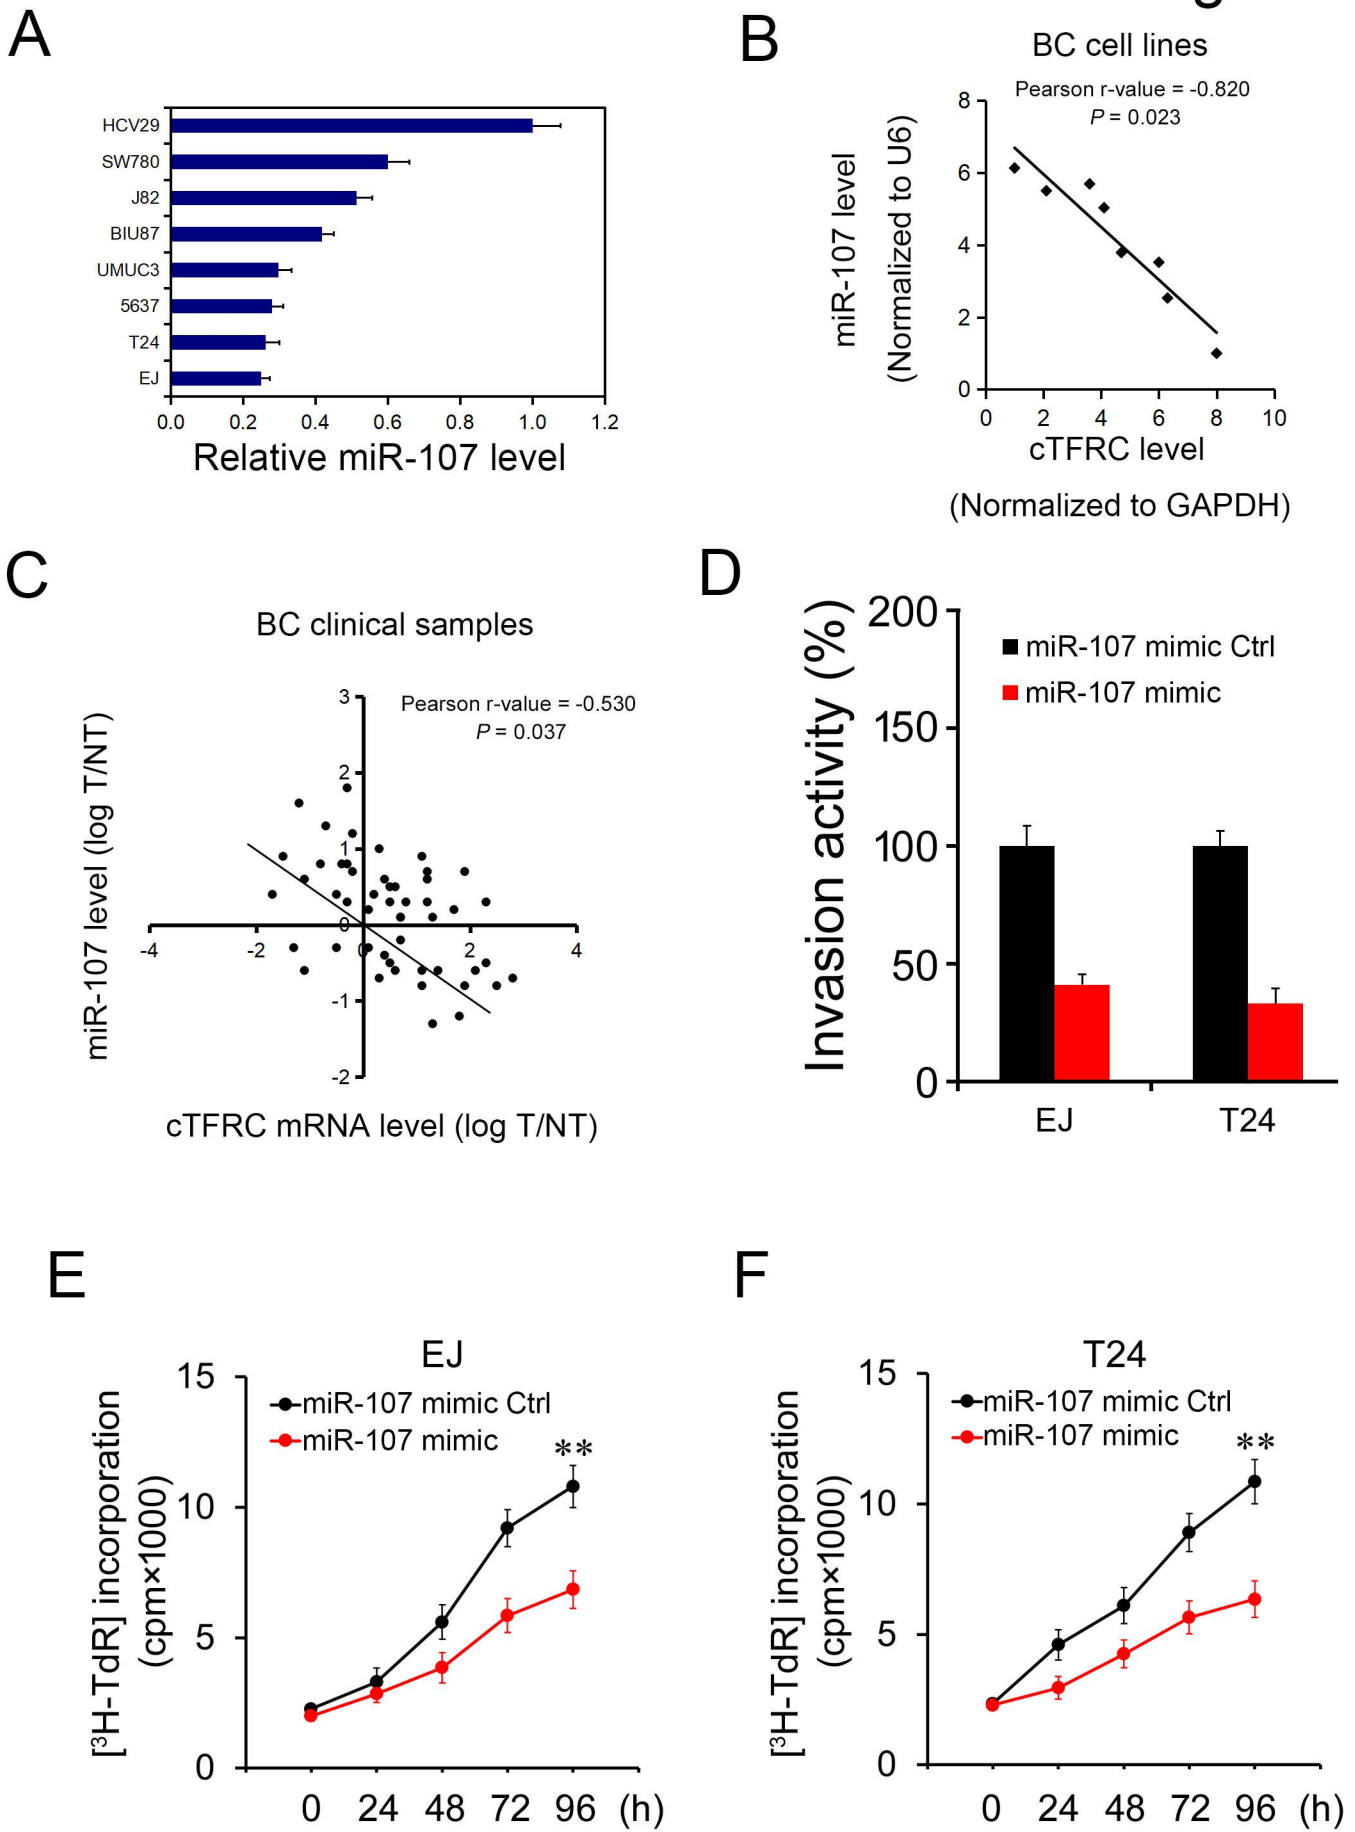

**Table S1. Primers for qRT-PCR analysis**

| Name             | Sequences (5'—3')                                          |
|------------------|------------------------------------------------------------|
| qRT-PCR primers* |                                                            |
| cTFRC            | F: TGCTGTCCAGCAGCCATAGG; R: TCATTCTGAACTGCCACACAGA         |
| TFRC             | F: ACTTGCCCAGATGTTCTCAG; R: GTATCCCTCTAGCCATTCAGTG         |
| U6               | F: CGAGCACAGAATCGCTTCA; R: CTCGCTTCGGCAGCACATAT            |
| GAPDH            | F: AAGGTGAAGGTCGGAGTCAA; R: GGAAGATGGTGATGGGATTT           |
| ATCB             | F: TCCCAACAGCTT; R: ATGACGTCTGGGCCTGTCTA                   |
| miR-107          | F: CAGCAGCATTGTACAGGGCTATCA; R: GGTCCAGTTTTTTTTTTTTTTTGGAC |

\* F, forward; R, reverse.

**Table S2. The sequences of the effective shRNAs**

| Name      | Sequences (5'—3')   |
|-----------|---------------------|
| shcTFRC-1 | TTGCGAGGTACCAGCAACT |
| shcTFRC-2 | CTTTCTGTTTTTGCGAGGT |
| shcTFRC-3 | AACTTCAAGGTTTCTGCCA |

**Table S3. The probes for fluorescence in situ hybridization**

| Name          | Sequences (5'—3')                                       |
|---------------|---------------------------------------------------------|
| cTFRC probe   | GGA AGG ATT ACA TGA CAT CTG ACC CAA AAC AAC CCC ACT GAC |
| miR-107 probe | TCT TTG GTT ATC TAG CTG TAT GA                          |
